# Supplementary material for: Complete Nucleotide Sequence Analysis of a Novel Bacillus subtilis-Infecting Bacteriophage BSP10 and Its Effect on Poly-Gamma-Glutamic Acid Degradation
Source: Viruses. 2018 May 4;10(5):240. doi: 10.3390/v10050240 (PMC5977233; doi:10.3390/v10050240)
Supplement: Supplementary file 1 [file viruses-10-00240-s001.zip › Supplementary Figures.pdf]

## Supplementary Figures

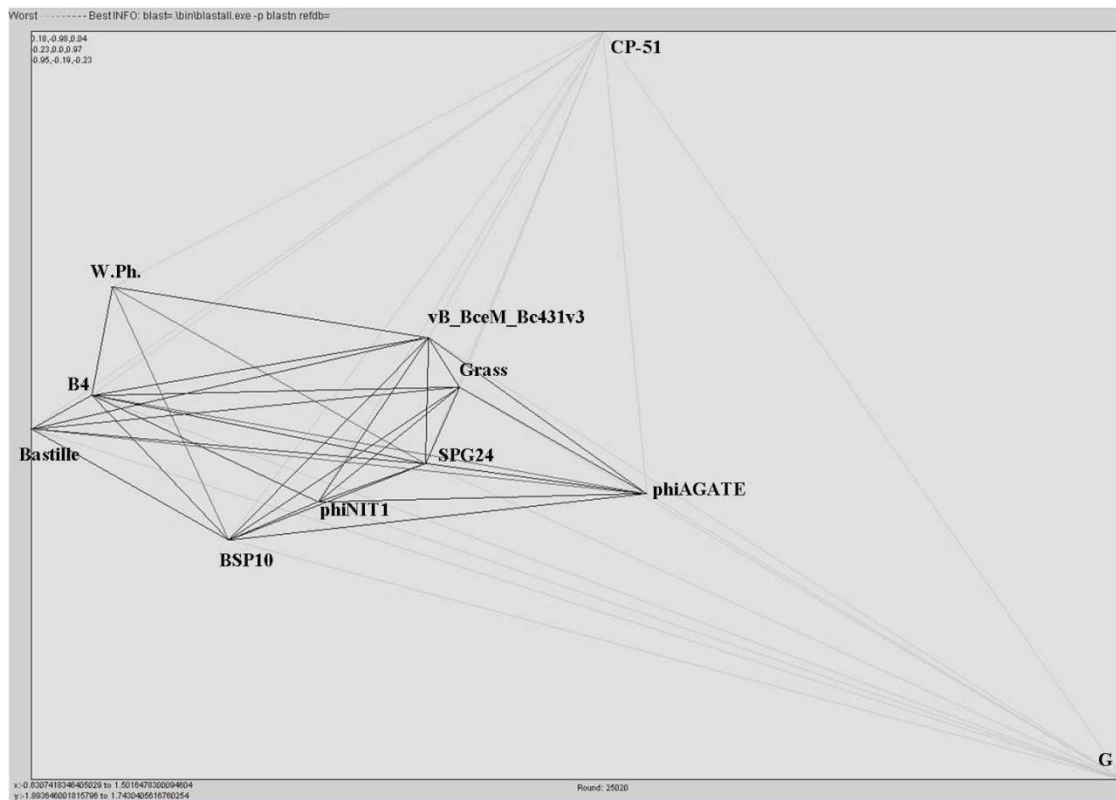

**Figure S1.** CLANS analysis of a total of 10 ICTV (International Committee on Taxonomy of Viruses)-classified *Bacillus* bacteriophages (phiNIT1, Grass, SPG24, phiAGATE, B4, Bastille, vB\_BceM\_Bc431v3, CP-51, W.Ph., and G), and bacteriophage BSP10. Edge weights were calculated from the P values of the BLASTN high-scoring segment pairs (e-value cut-off =  $1e-5$ ). The network was visualized after 25000 runs using the CLANS software package.

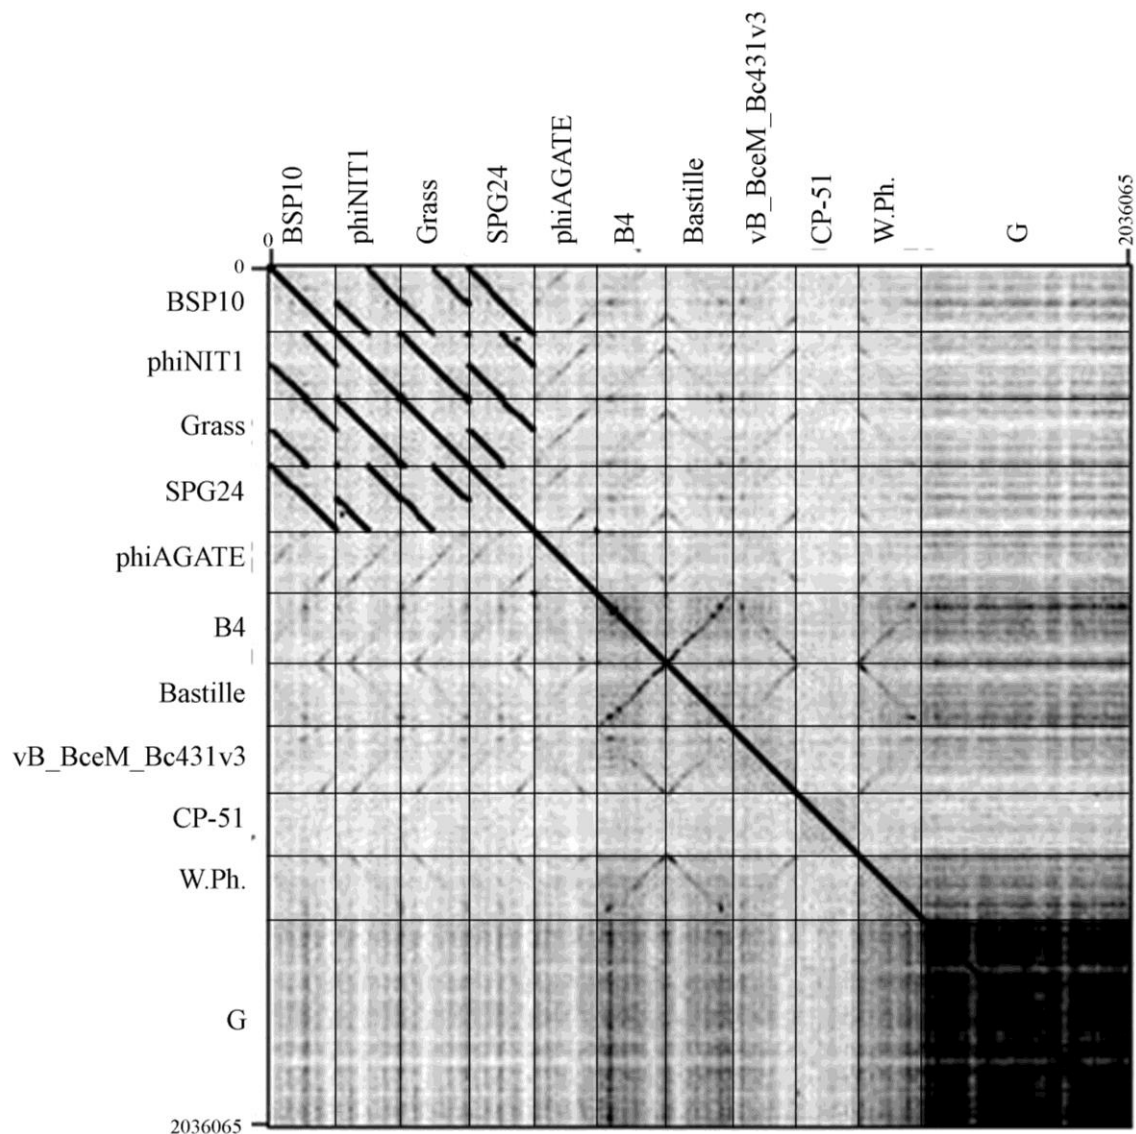

**Figure S2.** Whole-genome nucleotide dot plot of bacteriophage BSP10 and other ICTV (International Committee on Taxonomy of Viruses)-classified *Bacillus* bacteriophage (phiNIT1, Grass, SPG24, phiAGATE, B4, Bastille, vB\_BceM\_Bc431v3, CP-51, W.Ph., and G). Dot plots of whole genome sequences were generated using Gepard program.

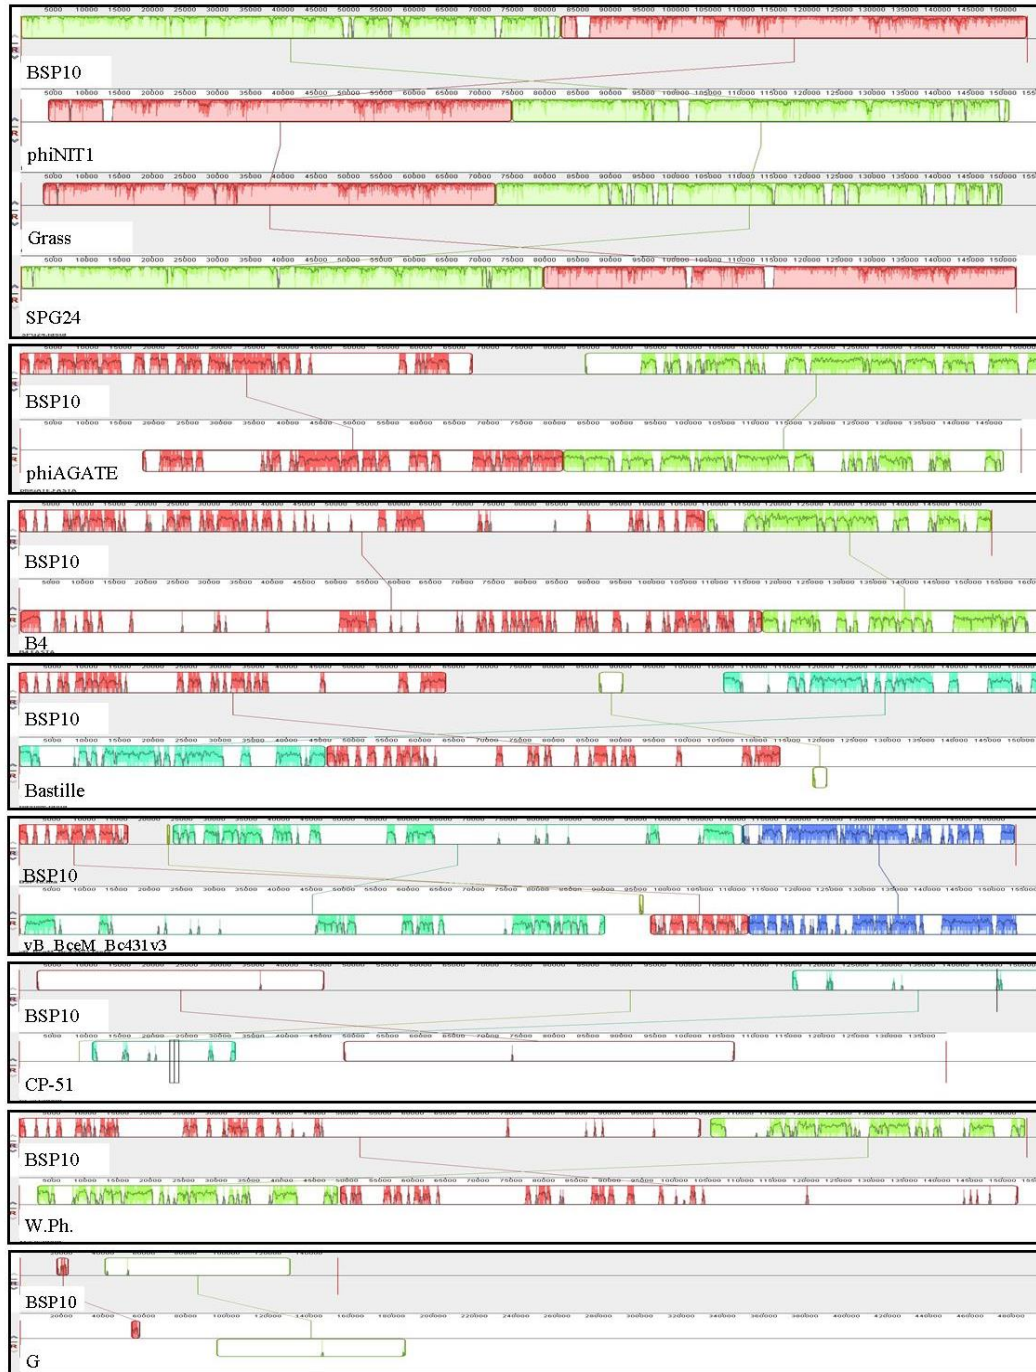

**Figure S3.** Bacteriophage BSP10 genome is compared with genus *Nit1virus* (bacteriophage phiNIT1, Grass, and SPG24), *Agatevirus* (phiAGATE), *B4virus* (B4), *Bastillevirus* (Bastille), *Bc431virus* (vB\_BceM\_Bc431v3), *Cp51virus* (CP-51), and *Wphvirus* (W.Ph.) as well as unassigned phage G using progressiveMauve alignment. Colored blocks indicate 1 to 1 best alignment and the sequence similarity is indicated by similarity plot within colored blocks.

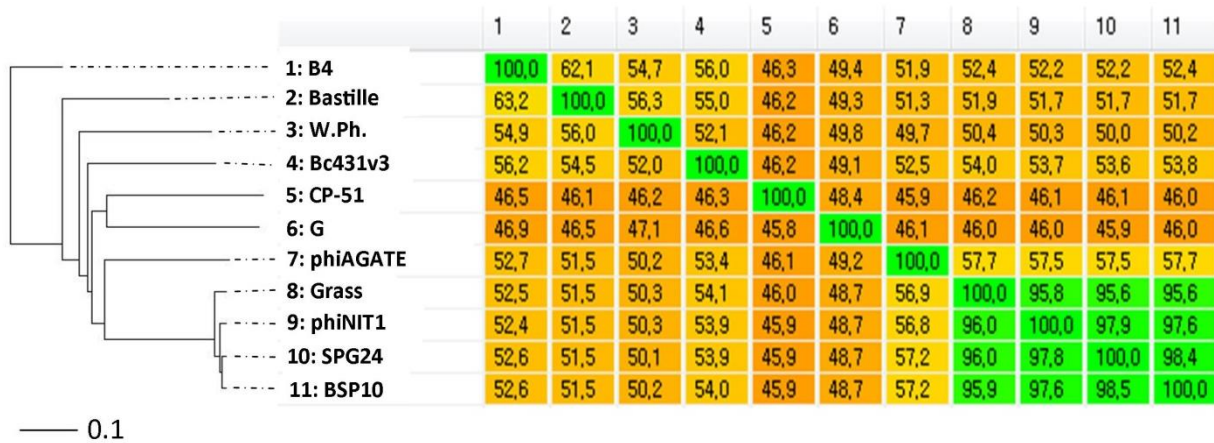

**Figure S4.** Heat-plot showing the results of genome comparison of bacteriophage BSP10 with other ICTV-classified *Bacillus* phage and the resulting phylogenetic tree. The similarity values were calculated using Gegenees software based on pairwise translated comparison of the analyzed sequences (tBLASTx method, fragment size -50, step size -25, threshold 10%). The heat plot colors reflect this similarity, ranging from low (red) to high (green). The tree was constructed with SplitsTree using the neighbor-joining method. The scale bar represents a 10% difference in the average tBLASTx score.
