# Supplementary material for: Complete Nucleotide Sequence Analysis of a Novel Bacillus subtilis-Infecting Bacteriophage BSP10 and Its Effect on Poly-Gamma-Glutamic Acid Degradation
Source: Viruses. 2018 May 4;10(5):240. doi: 10.3390/v10050240 (PMC5977233; doi:10.3390/v10050240)
Supplement: Supplementary file 1 [file viruses-10-00240-s001.zip › Supplementary Tables.pdf]

## Supplementary Tables

**Table S1.** Sensitivity of *Bacillus subtilis* strains against *Bacillus* bacteriophage BSP10.

| Bacteria name                       | Bacteriophage<br>BSP10 | Bacteria name                        | Bacteriophage<br>BSP10 |
|-------------------------------------|------------------------|--------------------------------------|------------------------|
| <i>Bacillus subtilis</i> ATCC 19659 | -                      | <i>Bacillus subtilis</i> KCCM 12511  | +                      |
| <i>Bacillus subtilis</i> ATCC 31028 | -                      | <i>Bacillus subtilis</i> KCCM 12512  | +                      |
| <i>Bacillus subtilis</i> ATCC 21697 | -                      | <i>Bacillus subtilis</i> KCCM 12513  | +                      |
| <i>Bacillus subtilis</i> ATCC 15245 | +                      | <i>Bacillus subtilis</i> KCCM 40084  | -                      |
| <i>Bacillus subtilis</i> ATCC 21556 | -                      | <i>Bacillus subtilis</i> KCCM 40820  | +                      |
| <i>Bacillus subtilis</i> ATCC 35854 | -                      | <i>Bacillus subtilis</i> KCCM 40821  | -                      |
| <i>Bacillus subtilis</i> ATCC 21332 | -                      | <i>Bacillus subtilis</i> KCCM 41462  | +                      |
| <i>Bacillus subtilis</i> ATCC 15841 | +                      | <i>Bacillus subtilis</i> KCCM 40088  | -                      |
| <i>Bacillus subtilis</i> ATCC 6051  | -                      | <i>Bacillus subtilis</i> KCCM 41990  | +                      |
| <i>Bacillus subtilis</i> ATCC 14593 | -                      | <i>Bacillus subtilis</i> KCCM 41991  | +                      |
| <i>Bacillus subtilis</i> ATCC 33677 | -                      | <i>Bacillus subtilis</i> KCCM 41992  | +                      |
| <i>Bacillus subtilis</i> ATCC 21336 | +                      | <i>Bacillus subtilis</i> KCCM 12247  | -                      |
| <i>Bacillus subtilis</i> ATCC 21770 | -                      | <i>Bacillus subtilis</i> KCCM 11780  | -                      |
| <i>Bacillus subtilis</i> ATCC 29233 | -                      | <i>Bacillus subtilis</i> KCCM 12248  | -                      |
| <i>Bacillus subtilis</i> ATCC 21228 | +                      | <i>Bacillus subtilis</i> KCCM 11314  | -                      |
| <i>Bacillus subtilis</i> ATCC 23059 | +                      | <i>Bacillus subtilis</i> KCCM 11732  | -                      |
| <i>Bacillus subtilis</i> ATCC 6633  | -                      | <i>Bacillus subtilis</i> KCTC 2217   | -                      |
| <i>Bacillus subtilis</i> KCCM 11496 | -                      | <i>Bacillus subtilis</i> KACC 10114  | -                      |
| <i>Bacillus subtilis</i> KCCM 11731 | -                      | <i>Bacillus subtilis</i> KACC 10112  | -                      |
| <i>Bacillus subtilis</i> KCCM 11733 | -                      | <i>Bacillus subtilis</i> KACC 17802  | +                      |
| <i>Bacillus subtilis</i> KCCM 11736 | +                      | <i>Bacillus subtilis</i> KACC 17796  | +                      |
| <i>Bacillus subtilis</i> KCCM 11738 | -                      | <i>Bacillus subtilis</i> KACC 17797  | +                      |
| <i>Bacillus subtilis</i> KCCM 12052 | -                      | <i>Bacillus subtilis</i> SRCM 101274 | -                      |
| <i>Bacillus subtilis</i> KCCM 12053 | -                      | <i>Bacillus subtilis</i> SRCM 100170 | -                      |
| <i>Bacillus subtilis</i> KCCM 12150 | -                      | <i>Bacillus subtilis</i> SRCM 100336 | -                      |
| <i>Bacillus subtilis</i> KCCM 12151 | -                      | <i>Bacillus subtilis</i> SRCM 100169 | -                      |

**+, clear lysis and forming plaques; -, no lysis**

**Table S2.** Functional grouping of annotated ORFs in *Bacillus* bacteriophage BSP10.

| Functional Group                           | ORF    | Putative function                              | Similar ORF of other phages |                     |           |                       |
|--------------------------------------------|--------|------------------------------------------------|-----------------------------|---------------------|-----------|-----------------------|
|                                            |        |                                                | Phage name                  | % Identity (BLASTP) | E-value   | Protein Accession No. |
| Structure                                  | ORF1   | putative tail protein                          | phiNIT1                     | 96                  | 0         | YP_008318362.1        |
|                                            | ORF3   | minor capsid protein                           | SPG24                       | 80                  | 7.00E-114 | YP_009273292.1        |
|                                            | ORF206 | putative prohead protease                      | phiNIT1                     | 99                  | 0         | YP_008318326.1        |
|                                            | ORF208 | putative major capsid protein                  | phiNIT1                     | 99                  | 0         | YP_008318328.1        |
|                                            | ORF215 | tail sheath protein                            | Grass                       | 99                  | 0         | YP_008771442.1        |
|                                            | ORF223 | putative tail fiber 1                          | Grass                       | 99                  | 0         | YP_008771450.1        |
|                                            | ORF224 | putative tail fiber 2                          | phiNIT1                     | 98                  | 0         | YP_008318348.1        |
|                                            | ORF225 | putative minor structural protein              | phiNIT1                     | 95                  | 0         | YP_008318350.1        |
|                                            | ORF231 | baseplate assembly protein                     | Grass                       | 98                  | 2.00E-177 | YP_008771458.1        |
|                                            | ORF232 | putative baseplate protein 1                   | phiNIT1                     | 99                  | 0         | YP_008318357.1        |
|                                            | ORF233 | putative baseplate protein 2                   | Grass                       | 98                  | 0         | YP_008771460.1        |
| DNA replication, transcription, and repair | ORF4   | putative intein containing DNA helicase        | phiNIT1                     | 99                  | 0         | YP_008318365.1        |
|                                            | ORF6   | putative DNA helicase 1                        | phiNIT1                     | 100                 | 0         | YP_008318367.1        |
|                                            | ORF7   | putative DNA repair exonuclease 1              | phiNIT1                     | 100                 | 0         | YP_008318368.1        |
|                                            | ORF8   | putative DNA repair exonuclease 2              | phiNIT1                     | 99                  | 0         | YP_008318369.1        |
|                                            | ORF10  | putative primase                               | phiNIT1                     | 98                  | 0         | YP_008318371.1        |
|                                            | ORF11  | dUTPase                                        | SPG24                       | 99                  | 0         | YP_009273307.1        |
|                                            | ORF12  | putative MarR family transcriptional regulator | phiNIT1                     | 98                  | 4.00E-70  | YP_008318373.1        |
|                                            | ORF15  | putative resolvase                             | phiNIT1                     | 100                 | 4.00E-133 | YP_008318375.1        |
|                                            | ORF27  | putative DNA binding protein 1                 | Grass                       | 100                 | 6.00E-62  | YP_008771493.1        |
|                                            | ORF29  | putative DNA polymerase                        | phiNIT1                     | 99                  | 0         | YP_008318389.1        |
|                                            | ORF31  | DNA polymerase C-terminal                      | phiNIT1                     | 99                  | 2.00E-161 | YP_008318392.1        |
|                                            | ORF35  | RecA                                           | Grass                       | 98                  | 0         | YP_008771502.1        |
|                                            | ORF37  | RNA polymerase sigma factor 1                  | Grass                       | 100                 | 7.00E-152 | YP_008771504.1        |
|                                            | ORF42  | metallophosphatase                             | phiNIT1                     | 99                  | 0         | YP_008318401.1        |
|                                            | ORF54  | putative transcription rho factor              | phiNIT1                     | 92                  | 3.00E-127 | YP_008318411.1        |
|                                            | ORF58  | putative DNA binding protein 2                 | phiNIT1                     | 98                  | 4.00E-131 | YP_008318415.1        |

|                                 |        |                                                                               |            |     |           |                |
|---------------------------------|--------|-------------------------------------------------------------------------------|------------|-----|-----------|----------------|
|                                 | ORF69  | RNA polymerase sigma factor 2                                                 | Grass      | 96  | 0         | YP_008771532.1 |
|                                 | ORF104 | putative transcriptional regulator                                            | Grass      | 100 | 1.00E-48  | YP_008771564.1 |
|                                 | ORF179 | putative nucleotidyltransferase-like protein                                  | phiNIT1    | 100 | 0         | YP_008318299.1 |
|                                 | ORF198 | putative XRE family transcriptional regulator 1                               | phiNIT1    | 98  | 1.00E-55  | YP_008318319.1 |
|                                 | ORF200 | putative XRE family transcriptional regulator 2                               | phiNIT1    | 99  | 3.00E-68  | YP_008318321.1 |
| Nucleotide metabolism           | ORF16  | putative ribonucleotide reductase stimulatory protein                         | phiNIT1    | 100 | 1.00E-86  | YP_008318376.1 |
|                                 | ORF17  | putative ribonucleotide-diphosphatereductase alpha sudunit N-terminal protein | phiNIT1    | 100 | 1.00E-175 | YP_008318377.1 |
|                                 | ORF19  | putative ribonucleotide-diphosphatereductase sudunit alpha C-terminal protein | phiNIT1    | 99  | 0         | YP_008318378.1 |
|                                 | ORF22  | ribonucleotide-diphosphate reductase beta subunit                             | SPG24      | 99  | 0         | YP_009273321.1 |
|                                 | ORF176 | dihydrofolate reductase                                                       | Grass      | 99  | 5.00E-120 | YP_008771402.1 |
|                                 | ORF177 | putative adenylate kinase and related kinases                                 | phiNIT1    | 98  | 5.00E-140 | YP_008318297.1 |
|                                 | ORF178 | putative thymidylate synthase                                                 | phiNIT1    | 99  | 0         | YP_008318298.1 |
| DNA packaging                   | ORF189 | terminase large subunit                                                       | 1102phi1-3 | 98  | 0         | AAS45252.1     |
|                                 | ORF205 | putative portal protein                                                       | phiNIT1    | 99  | 0         | YP_008318325.1 |
| Introns and homing endonuclease | ORF18  | intron associated endonuclease                                                | SPG24      | 100 | 9.00E-175 | YP_009273314.1 |
|                                 | ORF30  | HNH homing endonuclease 1                                                     | Moonbeam   | 42  | 9.00E-44  | YP_009151680.1 |
|                                 | ORF48  | HNH homing endonuclease 2                                                     | BCP8-2     | 48  | 8.00E-77  | YP_009149704.1 |
|                                 | ORF85  | HNH homing endonuclease 3                                                     | Moonbeam   | 50  | 2.00E-68  | YP_009151745.1 |
| Host lysis                      | ORF38  | putative holin protein                                                        | phiNIT1    | 100 | 3.00E-64  | YP_008318398.1 |
|                                 | ORF185 | endolysin                                                                     | phiNIT1    | 98  | 0         | YP_008318305.1 |
|                                 | ORF221 | endo-beta-N-acetylglucosamidase                                               | Grass      | 96  | 0         | YP_008771448.1 |
|                                 | ORF222 | putative tail lysin                                                           | Grass      | 95  | 0         | YP_008771449.1 |
| Others                          | ORF24  | thioredoxin                                                                   | SIOfphi    | 94  | 9.00E-46  | AGK86984.1     |
|                                 | ORF83  | plasmid segregation protein                                                   | Grass      | 98  | 0         | YP_008771547.1 |
|                                 | ORF86  | putative peptidase                                                            | phiNIT1    | 84  | 1.00E-111 | YP_008318432.1 |

|        |                                        |         |     |           |                |
|--------|----------------------------------------|---------|-----|-----------|----------------|
| ORF91  | FtsK/SpoIIIE protein                   | phiNIT1 | 98  | 0         | YP_008318436.1 |
| ORF119 | putative conserved lipoprotein         | Grass   | 98  | 2.00E-90  | YP_008771583.1 |
| ORF172 | poly-gamma-glutamate hydrolase         | BSNPO1  | 99  | 8.00E-153 | AEI59296.1     |
| ORF183 | phosphate starvation-inducible protein | Grass   | 99  | 2.00E-168 | YP_008771410.1 |
| ORF217 | putative cell wall binding protein     | Grass   | 100 | 1.00E-137 | YP_008771444.1 |

**Table S3.** Homing endonuclease in bacteriophage BSP10 genome predicted by HHpred program.

| ORF   | Target gene                                       | Homolog                                                                                                    | Homing endonuclease family | E value  |
|-------|---------------------------------------------------|------------------------------------------------------------------------------------------------------------|----------------------------|----------|
| ORF18 | Ribonucleotide-diphosphatereductase alpha subunit | 1MK0 catalytic domain of intron endonuclease I-TevI, E75A mutant <i>Enterobacteria</i> phage t4 sensu lato | GIY-YIG                    | 4.90E-20 |
| ORF30 | DNA polymerase                                    | 1U3E DNA binding and cleavage by the HNH homing endonuclease I-HmuI <i>Bacillus</i> virus SPO1             | HNH                        | 7.80E-09 |
| ORF48 | -                                                 | 1U3E DNA binding and cleavage by the HNH homing endonuclease I-HmuI <i>Bacillus</i> virus SPO1             | HNH                        | 3.50E-11 |
| ORF85 | -                                                 | 1U3E DNA binding and cleavage by the HNH homing endonuclease I-HmuI <i>Bacillus</i> virus SPO1             | HNH                        | 5.30E-32 |
